# Supplementary material
Source: Royal Society of Chemistry journal article supplement (doi:10.1039/d6pm00045b)
Supplement: d6pm00045b1.pdf [file d6pm00045b1.pdf]

## Supplimentary Information

### **Chitosan-Coated Cobalt Ferrite Nanocomplexes with Dual Antimicrobial Activity and Hemocompatibility**

<sup>1</sup>Md Salman Shakil, <sup>2</sup>Shakil Ahmed Polash, <sup>2</sup>Md. Monir Hossain, <sup>3</sup>Mahruba Sultana Niloy, <sup>3</sup>Mohammad Mahfuz Ali Khan Shawan, <sup>4</sup>Sheikh Manjura Hoque, <sup>3,\*</sup>Md. Ashraful Hasan, <sup>2,\*</sup>Satya Ranjan Sarker

<sup>1</sup>Department of Microbiology, Brac University, Kha 224 Pragati Sarani, Merul Badda, Dhaka 1212, Bangladesh

<sup>2</sup>Department of Biotechnology and Genetic Engineering, Jahangirnagar University, Savar, Dhaka 1342, Bangladesh

<sup>3</sup>Department of Biochemistry and Molecular Biology, Jahangirnagar University, Savar, Dhaka 1342, Bangladesh

<sup>4</sup>Material Science Division, Atomic Energy Centre, Dhaka 1000, Bangladesh

## Table of Contents:

Table S1: Characterization parameters of CFs, CH and CCFs.

Table S2: MIC of CCFs, CH and CFs against bacteria.

Figure S1: Trypan blue dye exclusion assay showing CH, CFs, and CCFs induced bacterial cell wall damage.

Reference

**Table S1:** Characterization parameters of CFs, CH and CCFs.<sup>1</sup>

|      | Size                    | Hydrodynamic Diameter (nm) | $\zeta$ Potential | $M_{\max}$ (emu/g)            |
|------|-------------------------|----------------------------|-------------------|-------------------------------|
| CCFs | (10 ± 0.7 nm)<br>(STEM) | 161 ± 5 nm<br>(at 25 °C)   | 49.9 ± 0.98       | 25.4 (Dried)<br>7.5 (Colloid) |
| CFs  | 10 nm (Xrd)             | NR                         | 8.75 ± 0.26       | 57.2 (Dried)                  |
| CH   | NR                      | NR                         | 31.4 ± 3.14       | NR                            |

CCFs: Chitosan-coated cobalt ferrite nanoparticles, CFs: Cobalt ferrite nanoparticles; CH: Chitosan; STEM: Scanning Transmission Electron Microscopy, Xrd: X-ray diffraction;  $M_{\max}$ : Maximum Magnetization; NR: Not reported.

**Table S2:** MIC of CCFs, CHs and CFs against bacteria.

| Bacteria                              | Drug Candidates ( $\mu\text{g}$ ) |        |        |
|---------------------------------------|-----------------------------------|--------|--------|
|                                       | CCFs                              | CH     | CFs    |
| <i>B. subtilis</i>                    | 0.000391                          | 0.05   | 0.0125 |
| <i>E. coli DH5<math>\alpha</math></i> | 0.000391                          | 0.0125 | 0.0125 |
| <i>E. faecialis</i>                   | 0.000781                          | 0.05   | 0.0125 |
| <i>S. flex i3C</i>                    | 0.003125                          | 0.0125 | 0.0125 |
| <i>E. coli Epec</i>                   | 0.000781                          | 0.05   | 0.0125 |
| <i>S. aureus</i>                      | 0.000781                          | 0.0125 | 0.0125 |
| <i>E. coli K 12</i>                   | 0.000391                          | 0.0125 | 0.0125 |
| <i>Salmonella typhi AF-4500</i>       | 0.000391                          | 0.0125 | 0.05   |
| <i>Vibrio cholerae</i>                | 0.000781                          | 0.05   | 0.0125 |

CF: Cobalt ferrite nanoparticles, CH: Chitosan, CCF: Chitosan-coated cobalt ferrite nanoparticles

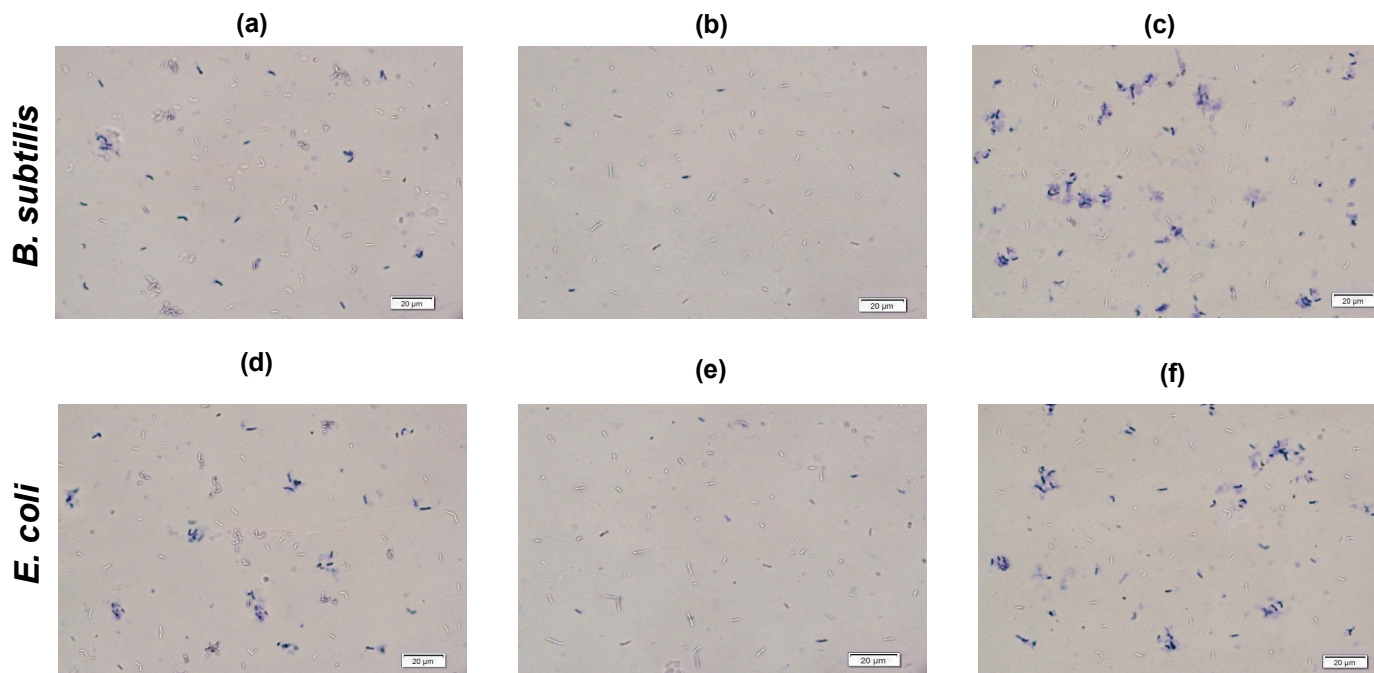

**Figure S1:** Trypan blue dye exclusion assay showing CH, CFs, and CCFs induced bacterial cell wall damage. *B. subtilis* and *E. coli* in the presence of CH (a, d), CFs (b, e) and CCFs (c, f). Dead cells are indicated as white arrow. The images were taken using Phase Contrast Light Microscope at 40X magnification. CFs: Cobalt ferrite nanoparticles, CH: Chitosan, CCFs: Chitosan-coated cobalt ferrite nanoparticles.

## Reference

(1) Shakil, M. S.; Hasan, M. A.; Uddin, M. F.; Islam, A.; Nahar, A.; Das, H.; Khan, M. N. I.; Dey, B. P.; Rokeya, B.; Hoque, S. M. In Vivo Toxicity Studies of Chitosan-Coated Cobalt Ferrite Nanocomplex for Its Application as MRI Contrast Dye. *ACS Appl Bio Mater* **2020**, 3 (11), 7952-7964. DOI: 10.1021/acsabm.0c01069 From NLM.
